# Supplementary material
Source: publisher figshare collection journal article supplement (https://karger.figshare.com/articles/dataset/_/4056555)
Supplement: Supplementary file 1 [file 1]

| <b>CBF</b>                              | Minute 1 | Minute 2 | Minute 3 | Minute 4 | Minute 5 | Minute 6 | Minute 7 |
|-----------------------------------------|----------|----------|----------|----------|----------|----------|----------|
| Betahistine + Demethylbetahistine       |          |          |          | 0.001    | 0.001    | 0.001    | 0.001    |
| Betahistine + Diphenhydramine           |          |          |          |          |          |          |          |
| Betahistine + $\alpha$ -Methylhistamine |          |          | 0.001    | 0.007    | 0.001    | 0.001    | 0.001    |
| Betahistine + Thioperamid               |          |          |          | 0.001    | 0.001    | 0.001    | 0.001    |
| Betahistine + Proxyfan                  |          |          |          | 0.031    | 0.015    | 0.001    | 0.001    |
| Betahistine + Idazoxan                  |          | 0.018    | 0.001    | 0.001    | 0.001    | 0.001    | 0.001    |
| Betahistine + Yohimbine                 |          |          |          | 0.007    | 0.013    | 0.001    | 0.001    |
| Ciproxifan                              |          |          |          |          | 0.041    | 0.001    | 0.001    |

| <b>nCBF</b>                             | Minute 1 | Minute 2 | Minute 3 | Minute 4 | Minute 5 | Minute 6 | Minute 7 |
|-----------------------------------------|----------|----------|----------|----------|----------|----------|----------|
| Betahistine + Demethylbetahistine       |          |          |          |          |          |          |          |
| Betahistine + Diphenhydramine           |          |          |          |          |          |          |          |
| Betahistine + $\alpha$ -Methylhistamine |          |          |          |          |          |          |          |
| Betahistine + Thioperamid               |          |          |          |          |          |          |          |
| Betahistine + Proxyfan                  |          |          |          |          |          |          |          |
| Betahistine + Idazoxan                  |          |          |          |          |          |          |          |
| Betahistine + Yohimbine                 |          |          |          |          |          |          |          |
| Ciproxifan                              |          |          |          |          |          |          |          |

| <b>MAP</b>                              | Minute 1 | Minute 2 | Minute 3 | Minute 4 | Minute 5 | Minute 6 | Minute 7 |
|-----------------------------------------|----------|----------|----------|----------|----------|----------|----------|
| Betahistine + Demethylbetahistine       |          | 0.001    |          |          |          | 0.001    | 0.001    |
| Betahistine + Diphenhydramine           |          |          |          |          |          |          |          |
| Betahistine + $\alpha$ -Methylhistamine |          | 0.003    |          |          | 0.009    | 0.001    | 0.001    |
| Betahistine + Thioperamid               |          |          |          |          | 0.001    | 0.001    | 0.002    |
| Betahistine + Proxyfan                  |          |          |          |          |          | 0.017    | 0.021    |
| Betahistine + Idazoxan                  |          |          |          |          | 0.012    | 0.002    | 0.008    |
| Betahistine + Yohimbine                 |          |          |          |          | 0.027    | 0.006    | 0.016    |
| Ciproxifan                              |          |          |          |          |          |          |          |

| <b>CBF</b>                              | Minute 8 | Minute 9 | Minute 10 | Minute 11 | Minute 12 | Minute 13 | Minute 14 | Minute 15 |
|-----------------------------------------|----------|----------|-----------|-----------|-----------|-----------|-----------|-----------|
| Betahistine + Demethylbetahistine       | 0.001    | 0.001    | 0.001     | 0.001     | 0.001     | 0.001     | 0.001     | 0.001     |
| Betahistine + Diphenhydramine           |          |          |           |           |           |           |           |           |
| Betahistine + $\alpha$ -Methylhistamine | 0.001    | 0.001    | 0.001     | 0.001     | 0.001     | 0.001     | 0.001     | 0.001     |
| Betahistine + Thioperamid               | 0.001    | 0.001    | 0.001     | 0.001     | 0.001     | 0.001     | 0.014     | 0.009     |
| Betahistine + Proxyfan                  | 0.001    | 0.001    | 0.006     | 0.001     | 0.001     | 0.004     | 0.009     | 0.007     |
| Betahistine + Idazoxan                  | 0.003    | 0.001    | 0.015     | 0.001     | 0.002     | 0.003     | 0.020     | 0.037     |
| Betahistine + Yohimbine                 | 0.002    | 0.001    | 0.014     | 0.007     | 0.004     | 0.016     |           |           |
| Ciproxifan                              | 0.030    | 0.017    |           |           |           |           |           |           |

| <b>nCBF</b>                             | Minute 8 | Minute 9 | Minute 10 | Minute 11 | Minute 12 | Minute 13 | Minute 14 | Minute 15 |
|-----------------------------------------|----------|----------|-----------|-----------|-----------|-----------|-----------|-----------|
| Betahistine + Demethylbetahistine       |          |          |           |           |           |           |           |           |
| Betahistine + Diphenhydramine           |          |          |           |           |           |           |           |           |
| Betahistine + $\alpha$ -Methylhistamine |          |          |           |           |           |           |           |           |
| Betahistine + Thioperamid               |          |          |           |           |           |           |           |           |
| Betahistine + Proxyfan                  |          |          |           |           |           |           |           |           |
| Betahistine + Idazoxan                  |          |          |           |           |           |           |           |           |
| Betahistine + Yohimbine                 |          |          |           |           |           |           |           |           |
| Ciproxifan                              |          |          |           |           |           |           |           |           |

| <b>MAP</b>                              | Minute 8 | Minute 9 | Minute 10 | Minute 11 | Minute 12 | Minute 13 | Minute 14 | Minute 15 |
|-----------------------------------------|----------|----------|-----------|-----------|-----------|-----------|-----------|-----------|
| Betahistine + Demethylbetahistine       | 0.001    | 0.001    | 0.001     | 0.001     | 0.001     | 0.001     | 0.001     | 0.001     |
| Betahistine + Diphenhydramine           |          |          |           |           |           |           |           |           |
| Betahistine + $\alpha$ -Methylhistamine | 0.001    | 0.001    | 0.001     | 0.001     | 0.001     | 0.001     | 0.001     | 0.001     |
| Betahistine + Thioperamid               | 0.011    |          |           |           |           |           |           |           |
| Betahistine + Proxyfan                  | 0.049    |          |           |           |           |           |           |           |
| Betahistine + Idazoxan                  | 0.025    |          |           |           |           |           |           |           |
| Betahistine + Yohimbine                 |          |          |           |           |           |           |           |           |
| Ciproxifan                              |          |          |           |           |           |           |           |           |
